# Supplementary material for: Identification of patients at risk for pancreatic cancer in a 3-year timeframe based on machine learning algorithms
Source: Springer Nature journal article supplement (doi:10.1038/s41598-025-89607-8), 2025-04-05

S1 Fig. The Receiver Operating Characteristics Curve (AUROC 0.701 [0.684, 0.718]) of Model 2 on the held-out validation set to predict new-onset pancreatic cancer in a 3-year follow-up.

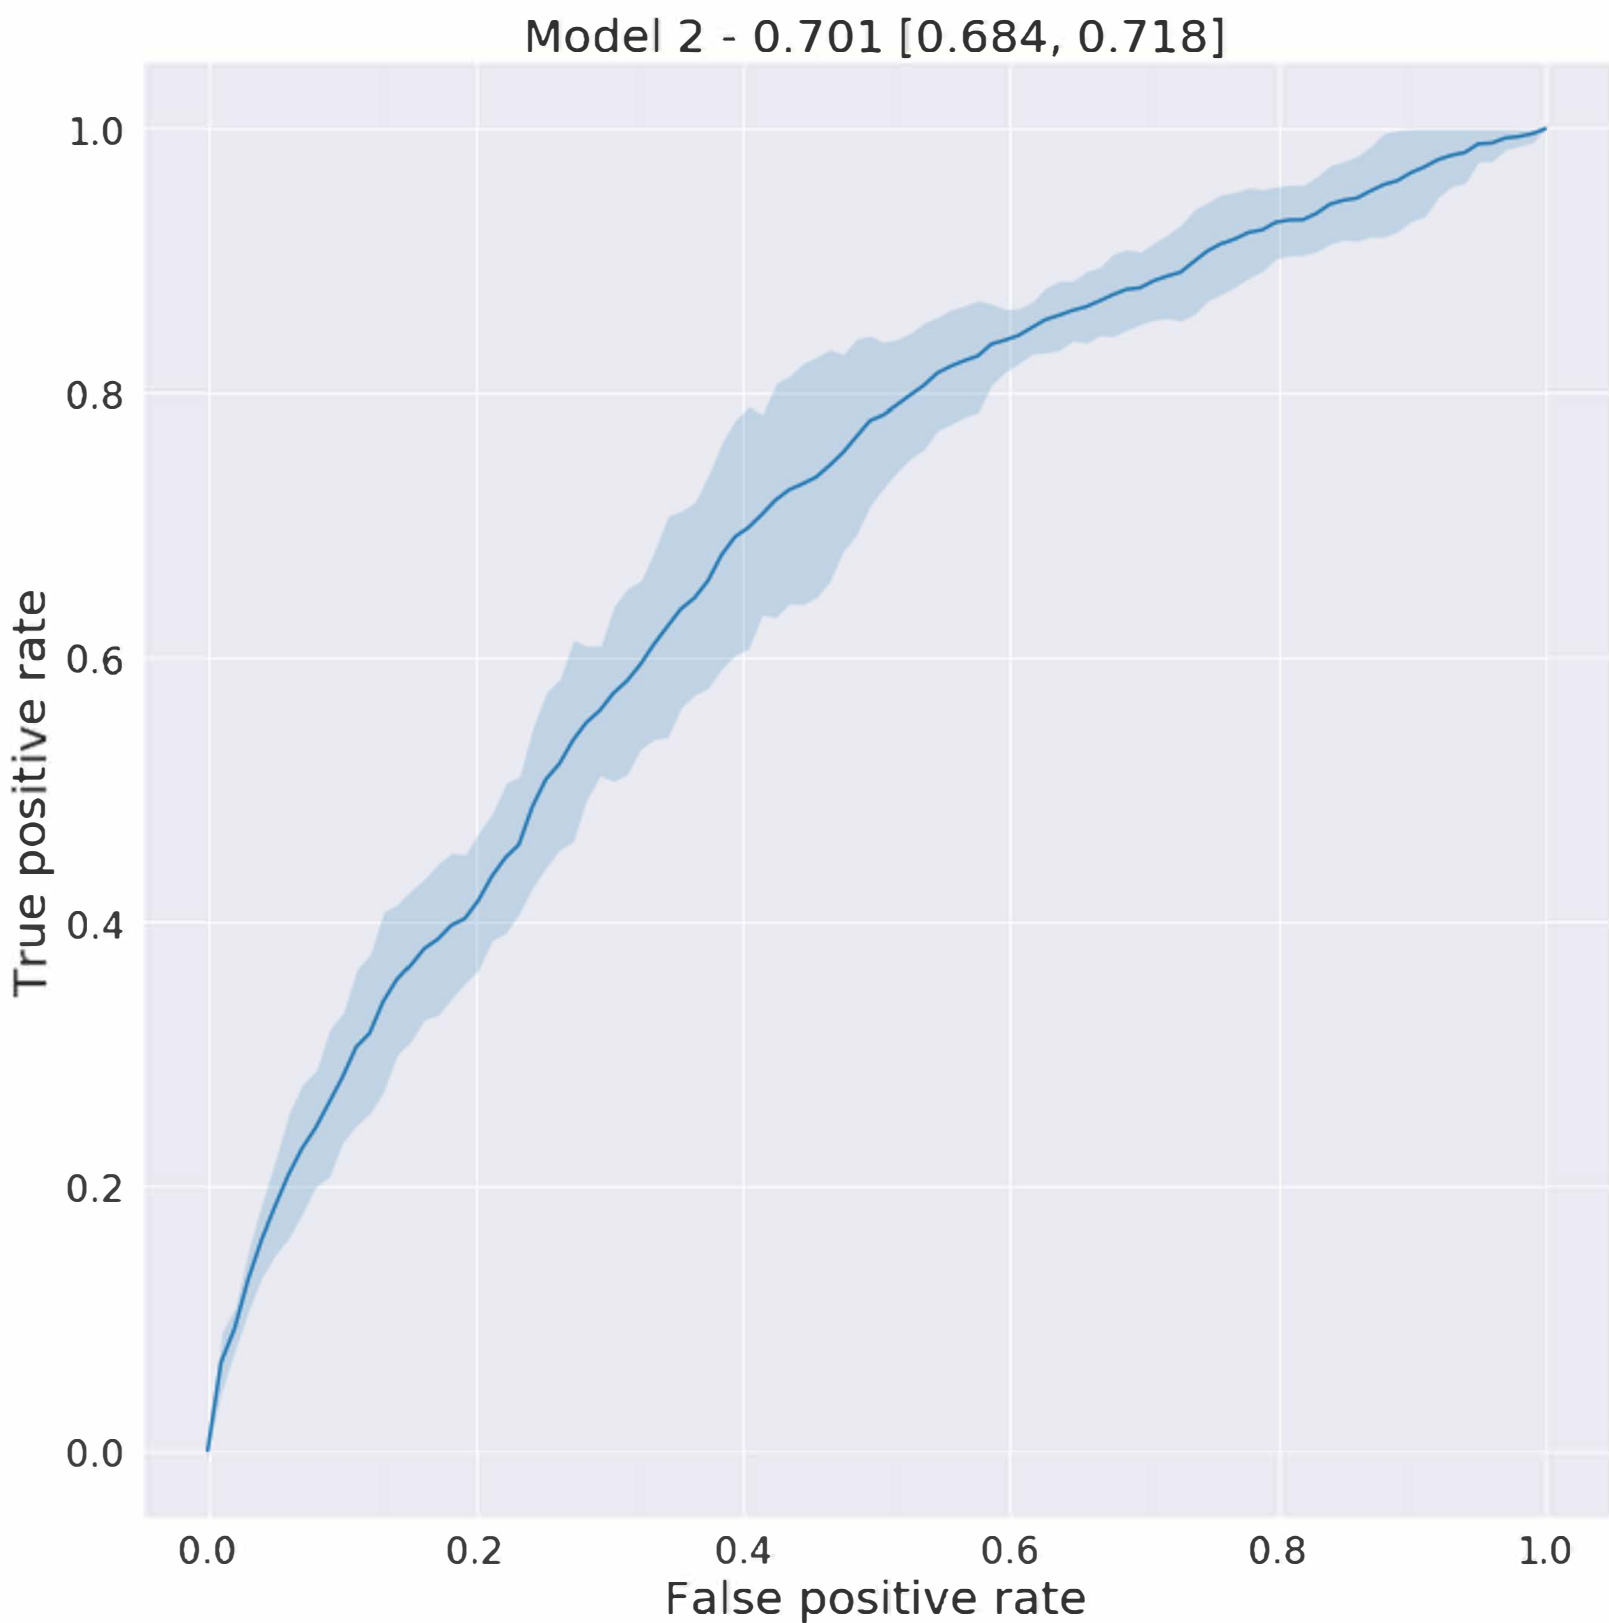

Supplement: MOESM1 [file 41598_2025_89607_MOESM1_ESM.pdf]
